# Supplementary material for: The First Genome Survey of the Snail Provanna glabra Inhabiting Deep-Sea Hydrothermal Vents
Source: MDPI journal article supplement (doi:10.3390/ani13213313), 2023-10-25
Supplement: s1 [file s1]

**Table S1.** Information of species included in the phylogenetic analysis.

| Species                                   | Accession No. |
|-------------------------------------------|---------------|
| <i>Amphioctopus marginatus</i> (outgroup) | NC_036351     |
| <i>Alviniconcha marisindica</i>           | OQ695489      |
| <i>Bolinus brandaris</i>                  | NC_013250     |
| <i>Conus borgesii</i>                     | NC_013243     |
| <i>Dendropoma maximum</i>                 | NC_014583     |
| <i>Ifremeria nautilei</i>                 | KC757644      |
| <i>Monoplex parthenopeus</i>              | NC_013247     |
| <i>Oncomelania hupensis</i>               | NC_013073     |
| <i>Provanna.sp</i>                        | KM675481      |
| <i>Haliotis rubra</i>                     | NC_005940     |
| <i>Albinaria caerulea</i>                 | NC_001761     |
| <i>Aplysia californica</i>                | NC_005827     |
| <i>Pupa strigosa</i>                      | NC_002176     |
| <i>Onchidella celtica</i>                 | NC_012376     |
| <i>Pyramidella dolabrata</i>              | NC_012435     |
| <i>Roboastra europaea</i>                 | NC_004321     |
| <i>Provanna glabra</i> (this study)       | OR209184      |
| <i>Gigantopelta aegis</i>                 | MW442948      |
| <i>Pomacea canaliculata</i>               | NC_024586     |
| <i>Lottia digitalis</i>                   | NC_007782     |
| <i>Alviniconcha adamantis</i>             | NC_080997     |
| <i>Nerita melanotragus</i>                | GU810158      |

**Table S2.** BUSCO evaluation for the draft genome of *P. glabra*.

| C          | D         | F            | M            |
|------------|-----------|--------------|--------------|
| 68 (7.00%) | 5 (0.50%) | 439 (44.90%) | 466 (47.60%) |

C, complete and single-copy BUSCOs. D, complete and duplicated BUSCOs. F, fragmented BUSCOs. M, missing BUSCOs.

**Table S3.** Statistics of repeat sequences in the draft genome of *P. glabra*.

|                          | Repeat Size(bp) | Percentage of genome(%) |
|--------------------------|-----------------|-------------------------|
| <b>TRF</b>               | 173,899,956     | 13.13                   |
| <b>Repeatmasker</b>      | 147,187,607     | 11.11                   |
| <b>RepeatProteinMask</b> | 38,782,100      | 2.93                    |
| <b>De novo</b>           | 403,602,007     | 30.46                   |
| <b>Total</b>             | 636,277,514     | 48.03                   |

**Table S4.** Proportions of TE types in different species.

| Species                         |               | TEs type        |        |        |       | References |
|---------------------------------|---------------|-----------------|--------|--------|-------|------------|
|                                 |               | DNA transposons | LTRs   | LINEs  | SINE  |            |
| <i>Provanna glabra</i>          | deep-sea      | 9.39%           | 3.75%  | 6.17%  | 4.53% |            |
| <i>Chrysomallon squamiferum</i> | deep-sea      | 17.73%          | 5.99%  | 5.65%  | *     |            |
| <i>Gigantopelta aegis</i>       | deep-sea      | 32.15%          | 13.32% | 11.51% | *     | [28]       |
| <i>Bathycyma lactea</i>         | deep-sea      | 10.4%           | 0.7%   | 6.5%   | 5.5%  | [33]       |
| <i>Pomacea canaliculate</i>     | shallow water | 6.84%           | 3.53%  | 8.63%  | *     |            |
| <i>Biomphalaria glabrata</i>    | shallow water | 20.20%          | 3.75%  | 23.93% | *     | [28]       |
| <i>Batillaria attramentaria</i> | shallow water | 3.81%           | *      | 4.83%  | 5.55% | [34]       |
| <i>Elysia chlorotica</i>        | shallow water | 6.2%            | 2.7%   | 5.6%   | 3.6%  | [35]       |

Note: “\*” represents a very low proportion of the TE type or not described in the original articles.

**Table S5.** Statistics of SSRs in the draft genome of *P. glabra*.

| SSR type   | Mono-nucleotide | Di-nucleotide | Tri-nucleotides | Tetra-nucleotides | Penta-nucleotides | Hexa-nucleotides | Total     |
|------------|-----------------|---------------|-----------------|-------------------|-------------------|------------------|-----------|
| Number     | 286,496         | 1,265,214     | 526,178         | 260,080           | 42,217            | 6,985            | 2,387,170 |
| Percentage | 12.00%          | 53.00%        | 22.04%          | 10.90%            | 1.77%             | 0.29%            | 100       |

**Table S6.** Information of mitochondrial genome of *P. glabra*.

| Gene            | Positions |      |            | Codons     |         |        |
|-----------------|-----------|------|------------|------------|---------|--------|
|                 | Start     | Stop | Length(bp) | Start/Stop | overlap | Strand |
| <i>cox1</i>     | 1         | 1536 | 1536       | ATG/TAA    | 22      | +      |
| <i>cox2</i>     | 1559      | 2245 | 687        | ATG/TAA    | 8       | +      |
| tRNA-Asp (GUC)  | 2254      | 2321 | 68         |            | 0       | +      |
| <i>atp8</i>     | 2322      | 2480 | 159        | ATG/TAA    | 2       | +      |
| <i>atp6</i>     | 2483      | 3178 | 696        | ATG/TAA    | 34      | +      |
| tRNA-Met (CAU)  | 3213      | 3280 | 68         |            | 1       | -      |
| tRNA-Tyr (GUA)  | 3282      | 3353 | 72         |            | 1       | -      |
| tRNA-Cys (GCA)  | 3355      | 3421 | 67         |            | 0       | -      |
| tRNA-Trp (UCA)  | 3422      | 3487 | 66         |            | -3      | -      |
| tRNA-Gln (UUG)  | 3485      | 3551 | 67         |            | 6       | -      |
| tRNA-Gly (UCC)  | 3558      | 3624 | 67         |            | 0       | -      |
| tRNA-Glu (UUC)  | 3625      | 3695 | 71         |            | 0       | -      |
| rrnS (12S rRNA) | 3696      | 4650 | 955        |            | -5      | +      |
| tRNA-Val (UAC)  | 4646      | 4712 | 67         |            | -18     | +      |
| rrnL (16S rRNA) | 4695      | 6109 | 1415       |            | 2       | +      |
| tRNA-Leu2 (UAA) | 6112      | 6180 | 69         |            | 35      | +      |
| tRNA-Leu1 (UAG) | 6216      | 6284 | 69         |            | -1      | +      |

|                 |       |       |      |         |      |   |
|-----------------|-------|-------|------|---------|------|---|
| <i>nad1</i>     | 6284  | 7225  | 942  | ATG/TAA | 0    | + |
| tRNA-Pro (UGG)  | 7226  | 7292  | 67   |         | 3    | + |
| <i>nad6</i>     | 7296  | 7796  | 501  | ATG/TAA | 8    | + |
| <i>cob</i>      | 7805  | 8944  | 1140 | ATG/TAA | 13   | + |
| tRNA-Ser2 (UGA) | 8958  | 9205  | 248  |         | -180 | + |
| tRNA-Thr (UGU)  | 9026  | 9093  | 68   |         | 13   | - |
| <i>nad4l</i>    | 9107  | 9403  | 297  | ATG/TAG | 5    | + |
| <i>nad4</i>     | 9409  | 10770 | 1362 | ATC/TAA | 3    | + |
| tRNA-His (GUG)  | 10774 | 10841 | 68   |         | -1   | + |
| <i>nad5</i>     | 10841 | 12562 | 1722 | ATG/TAA | 3    | + |
| tRNA-Phe (GAA)  | 12566 | 12633 | 68   |         | 0    | + |
| <i>cox3</i>     | 13577 | 14356 | 780  |         | 41   | + |
| tRNA-Lys (UUU)  | 14398 | 14468 | 71   |         | 9    | + |
| tRNA-Ala (UGC)  | 14478 | 14547 | 70   |         | 7    | + |
| tRNA-Arg (UCG)  | 14555 | 14623 | 69   |         | 6    | + |
| tRNA-Asn (GUU)  | 14630 | 14698 | 69   |         | 7    | + |
| tRNA-Ile (GAU)  | 14706 | 14775 | 70   |         | 4    | + |
| <i>nad3</i>     | 14780 | 15133 | 354  | ATG/TAA | 1    | + |
| tRNA-Ser1 (GCU) | 15135 | 15202 | 68   |         | 0    | + |
| <i>nad2</i>     | 15203 | 16264 | 1062 | ATG/TAA | 3    | + |

**Table S7.** Evolutionary rate comparison of mitochondrial genes in the deep-sea and shallow water gastropod lineages.

| Gene name    | Model 0  | Model 2    |            | LRT <i>P</i> -value |
|--------------|----------|------------|------------|---------------------|
|              | $\omega$ | $\omega_0$ | $\omega_1$ |                     |
| <i>cox1</i>  | 0.00362  | 0.00215    | 0.00522    | <b>0.00597</b>      |
| <i>cox2</i>  | 0.01198  | 0.00901    | 0.0152     | 0.13296             |
| <i>cox3</i>  | 0.01305  | 0.00667    | 0.01815    | <b>0.00278</b>      |
| <i>cob</i>   | 0.01444  | 0.01589    | 0.01375    | 0.58174             |
| <i>atp6</i>  | 0.01714  | 0.01234    | 0.02033    | 0.11447             |
| <i>atp8</i>  | 0.03976  | 0.05319    | 0.03453    | 0.58174             |
| <i>nad1</i>  | 0.01346  | 0.0145     | 0.01312    | 0.79954             |
| <i>nad2</i>  | 0.01714  | 0.01234    | 0.02033    | 0.11447             |
| <i>nad3</i>  | 0.02985  | 0.0086     | 0.03475    | 0.17008             |
| <i>nad4</i>  | 0.02589  | 0.00135    | 0.02897    | <b>0.00333</b>      |
| <i>nad4l</i> | 0.01126  | 0.03953    | 0.00721    | <b>0.00721</b>      |
| <i>nad5</i>  | 0.02525  | 0.03201    | 0.02293    | 0.12336             |
| <i>nad6</i>  | 0.03571  | 0.03062    | 0.038      | 0.57723             |

Note: In Model 0, the  $\omega$  value represents the overall dN/dS ratio across all branches; in Model 2,  $\omega_0$  represents dN/dS ratio of shallow water species branch (background lineage), and  $\omega_2$  represents deep-sea species branch (foreground lineage). *P*-values<0.01 in bold means significant difference between M0 and M2 at this gene.
